# Supplementary material for: mRNA vaccines effectiveness against COVID-19 hospitalizations and deaths in older adults: a cohort study based on data-linkage of national health registries in Portugal
Source: bioRxiv or medRxiv preprint supplement (doi:10.1101/2021.08.27.21262731), 2021-08-29
Supplement: Supplementary file [file media-1.pdf]

1 **Supplementary material**

2 **mRNA vaccines effectiveness against COVID-19 hospitalizations and deaths in older**  
3 **adults: a cohort study based on data-linkage of national health registries in Portugal**

4 Tables

5 Table S1 – Study period times (days) and date of last event for COVID-19 hospitalization and  
6 deaths - cohort 65-79 and 80 yo or older.

|                 | Start      | End        | Duration (days) |
|-----------------|------------|------------|-----------------|
| 65-79 Cohort    |            |            |                 |
| Hospitalization | 30.03.2021 | 11.08.2021 | 134             |
| Deaths          | 30.03.2021 | 09.08.2021 | 132             |
| 80 + Cohort     |            |            |                 |
| Hospitalization | 02.02.2021 | 11.08.2021 | 190             |
| Deaths          | 02.02.2021 | 07.08.2021 | 186             |

7

8

9 Table S2– Distribution of time (days) since second dose for cohort 65-79 and ≥80 yo.

|                 | Median | Interquartile Range<br>(IQR) | Minimum-Maximum |
|-----------------|--------|------------------------------|-----------------|
| 65-79 yo Cohort | 78     | 71 to 94                     | 1 - 113         |
| ≥80 yo Cohort   | 125    | 112 to 145                   | 1 - 168         |

10

11

12

13

14

15 Table S3 – Comparison between the age group, sex and region distribution of the individuals  
 16 included in the 65-79 age cohort and the Portuguese population estimates (Statistics Portugal,  
 17 2020 population estimates).

|                 | Cohort (%)     | Population (%) |
|-----------------|----------------|----------------|
| 65-79 yo cohort |                |                |
| Age group       |                |                |
| 65-69           | 341,953 (38.9) | 602,210 (38.4) |
| 70-74           | 298,253 (34.0) | 536,388 (34.2) |
| 75-79           | 238,283 (27.1) | 428,706 (27.4) |
| Sex, male       | 385,128 (43.8) | 694,974 (44.3) |
| ≥80 yo cohort   |                |                |
| Age group       |                |                |
| 80-84           | 232,429 (50.4) | 337797 (51.0)  |
| 85+             | 228,391 (49.6) | 324027 (49.0)  |
| Sex, male       | 186,014 (40.4) | 239,436 (36.2) |

18

19

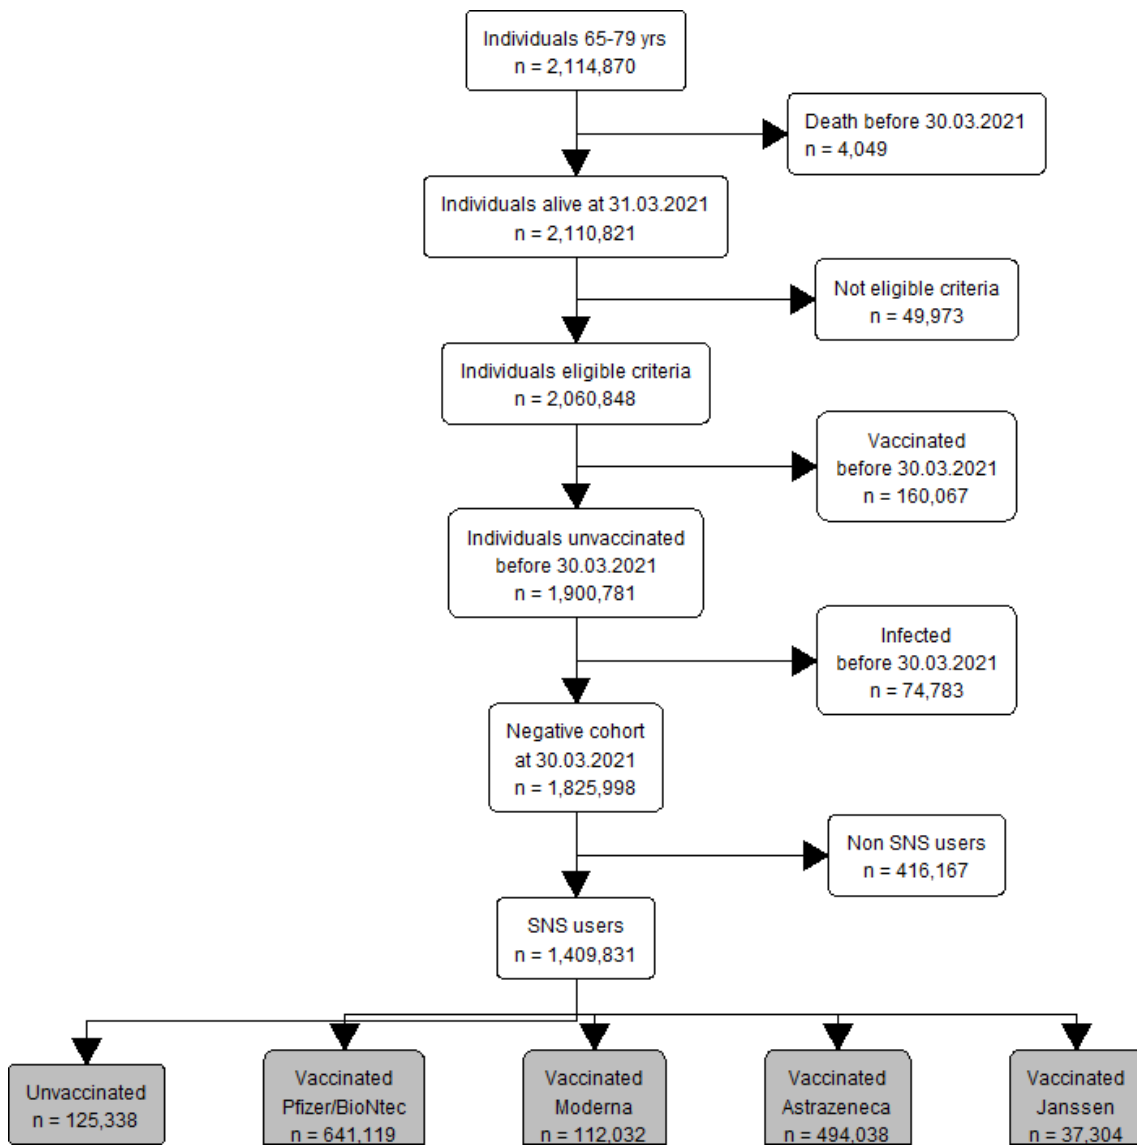

21

22 Figure S1 – Participants selection flowcharts 65-79 years old cohort

23

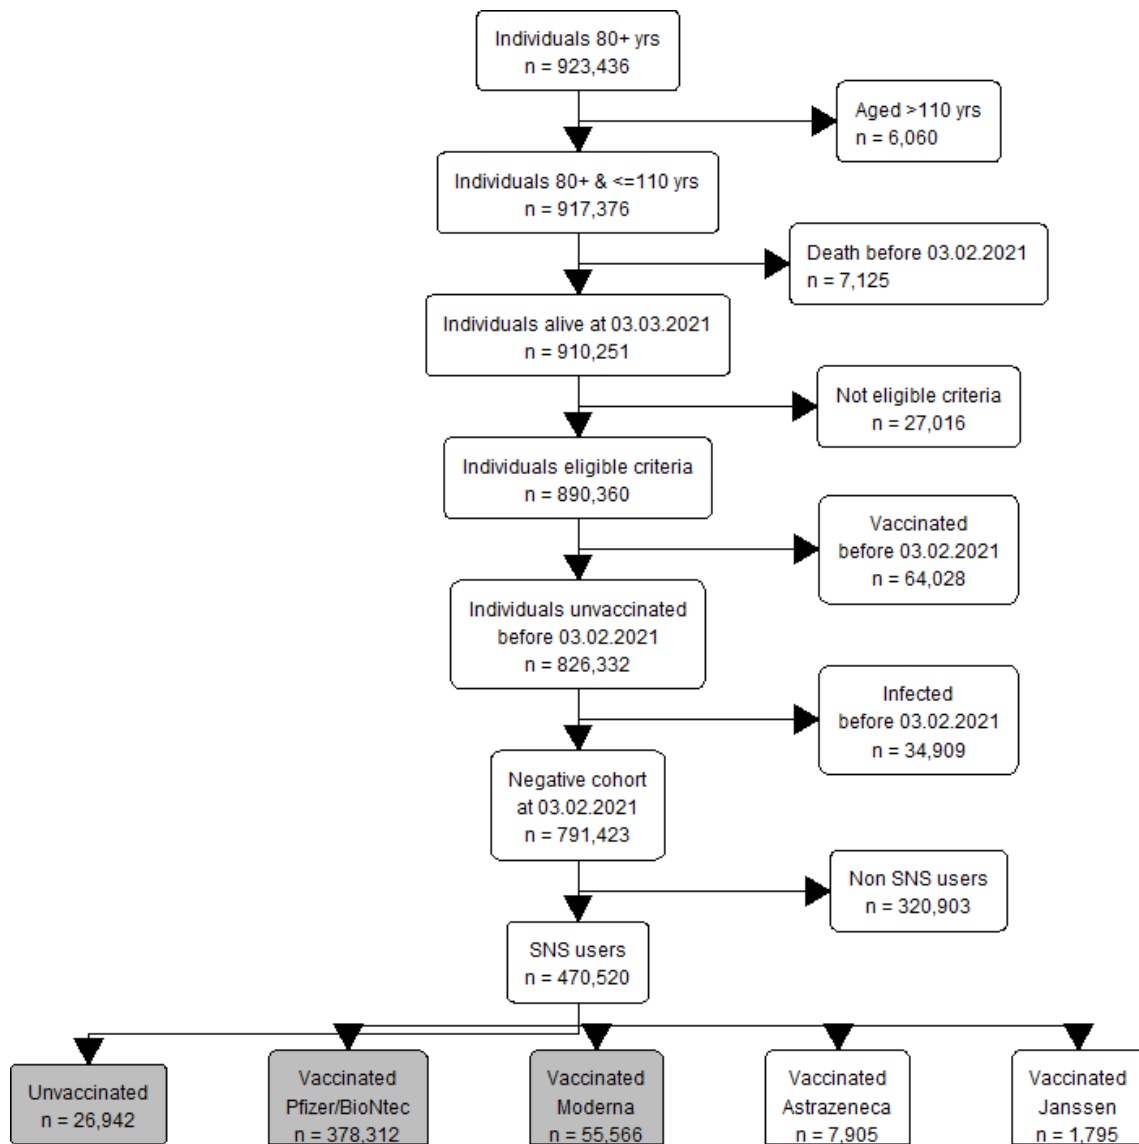

24

25

26 Figure S2 - Participants selection flowcharts  $\geq 80$  years old cohort

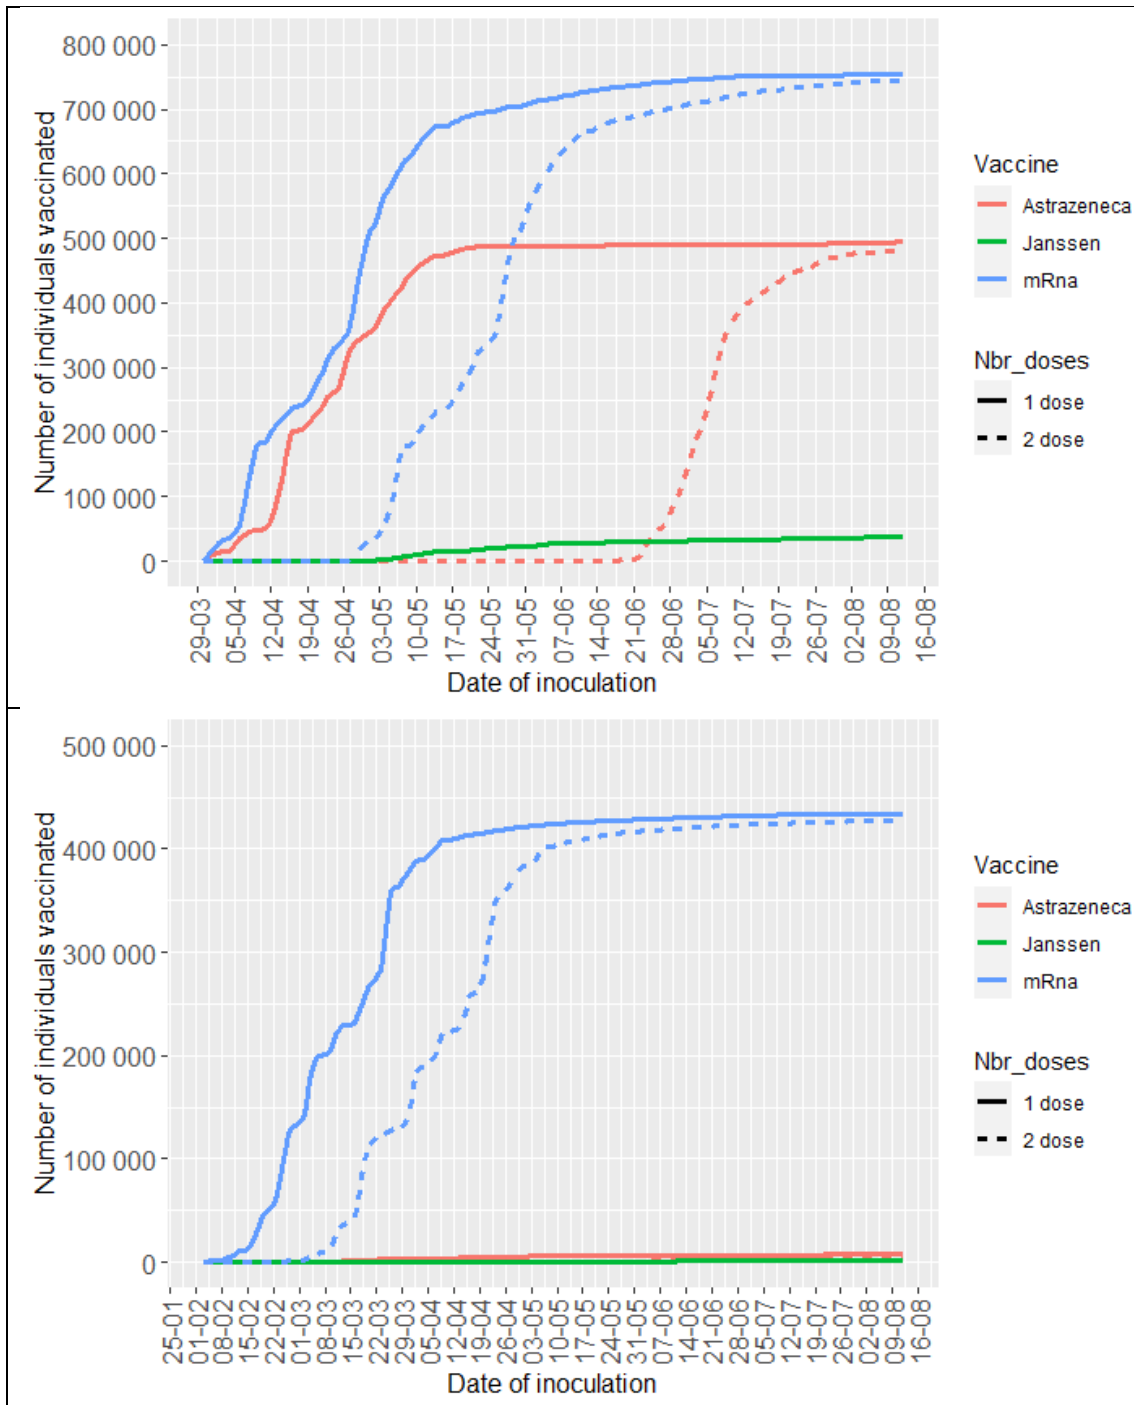

27  
 28  
 29  
 30  
 31

Figure S3– Daily accumulated number of individuals vaccinated with mRNA vaccines, according to the number of doses for the 65-79 age cohort (upper painel) and  $\geq 80$  years old cohort (lower painel).

32  
33

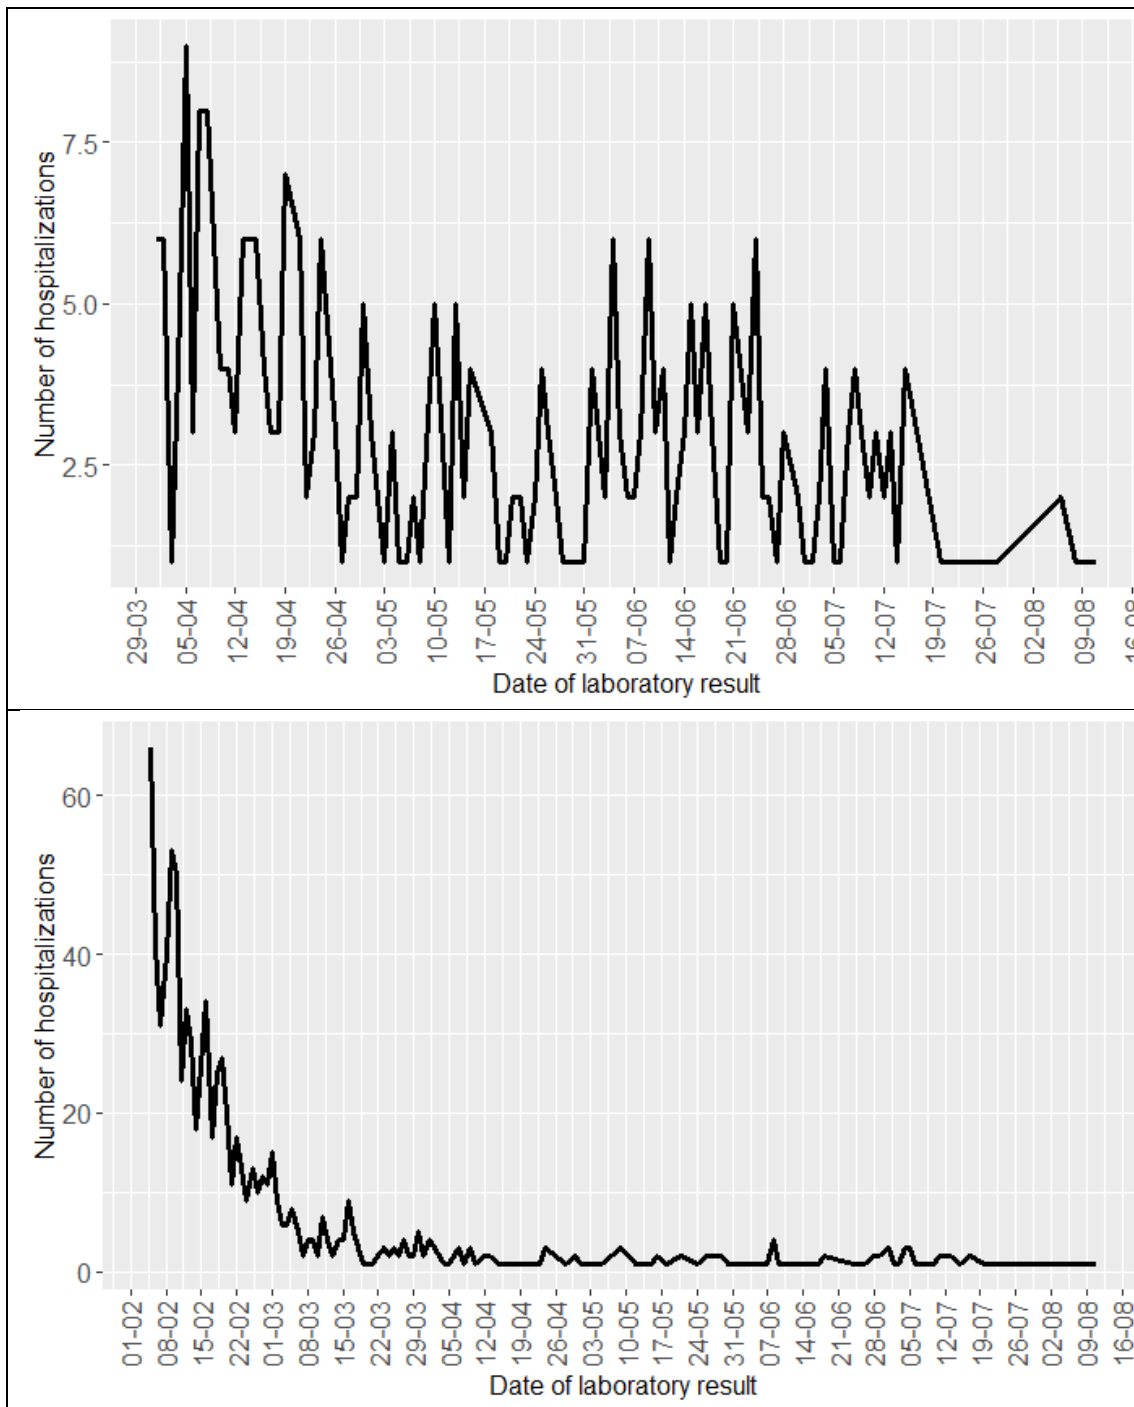

34 Figure S4 – Daily number of COVID-19 hospitalizations according to date of SARS-  
35 CoV-2 infection diagnosis for 65 to 79 cohort (upper painel) and  $\geq 80$  years old cohort  
36 (lower painel)  
37

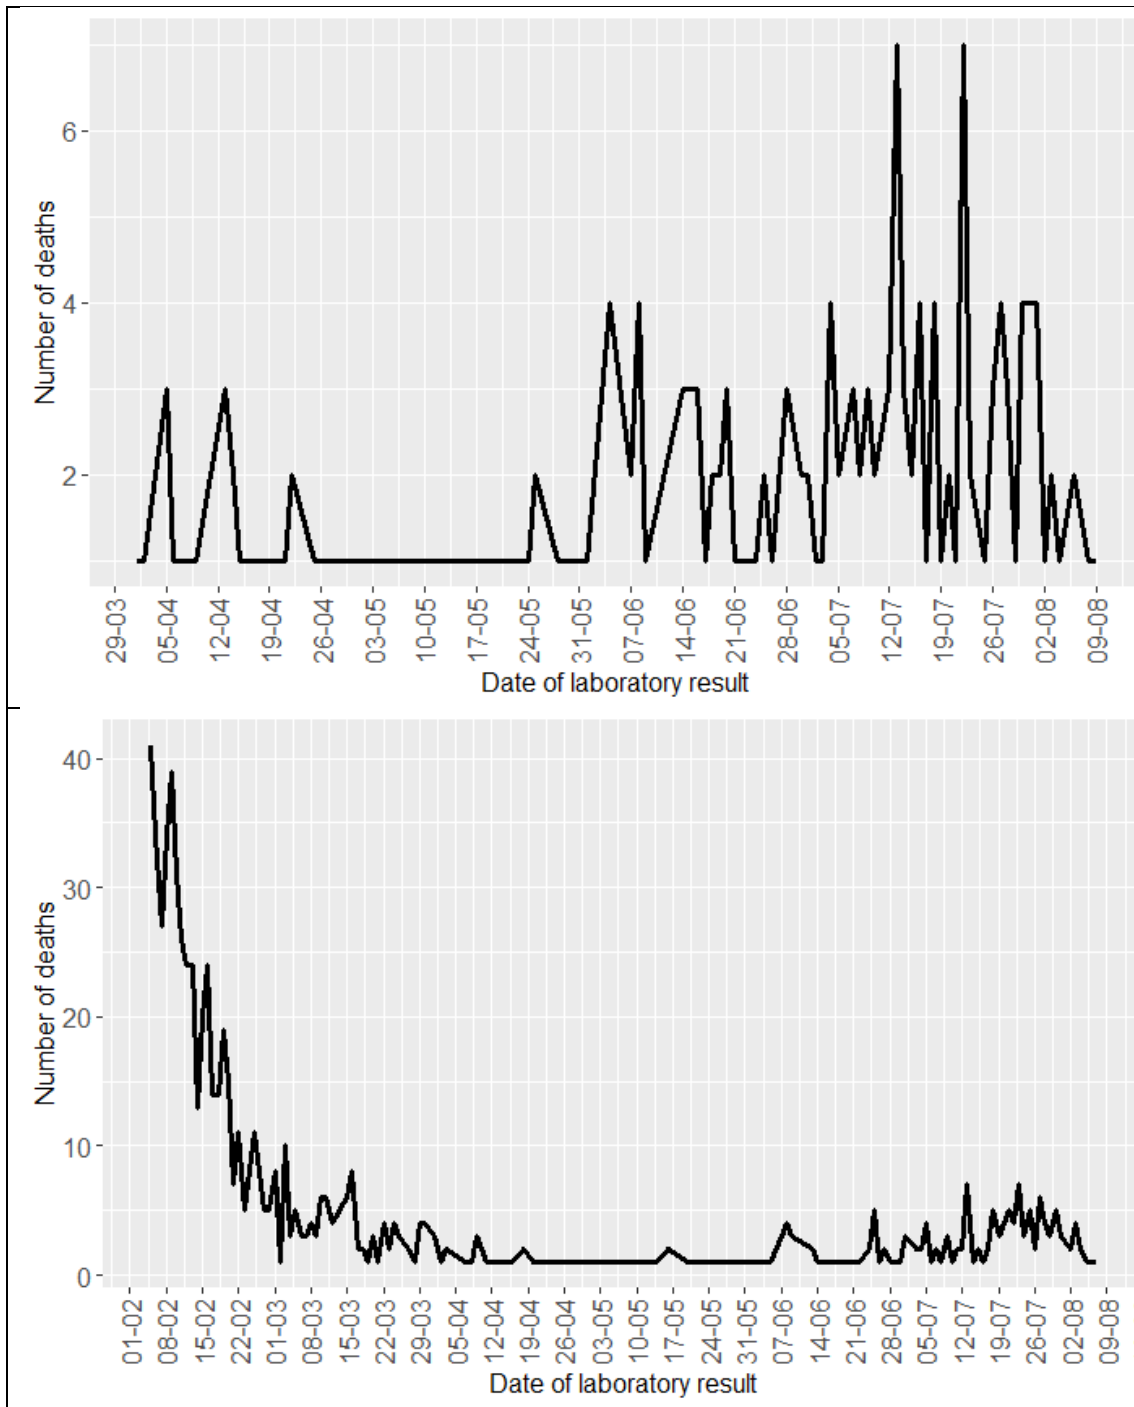

38 Figure S5 – Daily number of COVID-19 related deaths according to date SARS-CoV-2  
 39 infection diagnosis for 65 to 79 cohort (upper painel) and  $\geq 80$  years old (lower painel)
